# Supplementary material for: Specialist-Led Diabetes Registries and Prevalence of Poor Glycemic Control in Type 2 Diabetes: The Diabetes Registry Outcomes Project for A1C Reduction (DROP A1C)
Source: Oxford University Press journal article supplement (doi:10.2337/dc15-2666), 2016-08-11
Supplement: dc152666supplementarydata.pdf [file dc152666supplementarydata.pdf]

# SUPPLEMENTARY DATA

## Supplementary Appendix 1. Barriers to Care Questionnaire

| Question                                                                                                                                                                                | Yes | No | Answer |
|-----------------------------------------------------------------------------------------------------------------------------------------------------------------------------------------|-----|----|--------|
| General Diabetes                                                                                                                                                                        |     |    |        |
| Do you have other health problems that are more important to you than taking care of your diabetes?                                                                                     |     |    |        |
| Do you have other health problems that make it harder to take care of your diabetes? If yes, what?                                                                                      |     |    |        |
| Are you satisfied with the diabetes medications and/or treatment you have been prescribed?                                                                                              |     |    |        |
| Do you find it difficult to make changes to your lifestyle for your diabetes?                                                                                                           |     |    |        |
| Is there something specific holding you back from making your diabetes management a priority?<br>If yes, do you know what it is?                                                        |     |    |        |
| Feelings and Beliefs Towards Diabetes                                                                                                                                                   |     |    |        |
| Do you keep having diabetes a secret?                                                                                                                                                   |     |    |        |
| Do you think you will get complications from your diabetes?                                                                                                                             |     |    |        |
| Do you think having diabetes is serious?                                                                                                                                                |     |    |        |
| Do you feel you are able to look after your diabetes on your own? If no, what would help you?                                                                                           |     |    |        |
| Do you feel there is so much to do to take care of your diabetes that it is easier not to do anything?                                                                                  |     |    |        |
| Knowledge and Confidence                                                                                                                                                                |     |    |        |
| Have you been offered enough education sessions to help you understand diabetes?<br>If yes, did you find them helpful?                                                                  |     |    |        |
| Do you feel you need more information about diabetes?                                                                                                                                   |     |    |        |
| On a scale of 1-10 (1=very little and 10=a lot) how confident are you that you could explain diabetes to someone else? Why?                                                             |     |    |        |
| On a scale of 1-10 (1=very little and 10=a lot) how confident are you that you understand all the treatment options (medications and lifestyle) available for diabetes? Why?            |     |    |        |
| On a scale of 1-10 (1=very little and 10=a lot) how <i>important</i> is making necessary health behavior changes to make a difference in your blood sugar control?                      |     |    |        |
| On a scale of 1-10 (1=very little and 10= a lot) how <i>confident</i> are you that you can make the necessary health behavior changes to make a difference in your blood sugar control? |     |    |        |

## SUPPLEMENTARY DATA

| Access to your Diabetes Team and Diabetes Care                                                                                                                 |  |  |  |
|----------------------------------------------------------------------------------------------------------------------------------------------------------------|--|--|--|
| Do you have trouble getting to:<br>Your diabetes education centre<br>Your diabetes educator (dietitian or nurse)<br>Your family doctor<br>Your endocrinologist |  |  |  |
| Would you prefer if the diabetes clinic was closer to you?                                                                                                     |  |  |  |
| Is the office open at convenient times for you?                                                                                                                |  |  |  |
| Would you prefer if there were other options for your diabetes education visits, such as email, telephone or home visits? If yes, which option(s)?             |  |  |  |
| Are there other options you would prefer that I have not mentioned? If yes, which?                                                                             |  |  |  |
| Are you happy with your diabetes team?<br>If not, why?                                                                                                         |  |  |  |
| Do you feel comfortable contacting your diabetes team with questions?                                                                                          |  |  |  |
| Is having diabetes harder because of your financial situation? If yes, how?                                                                                    |  |  |  |
| Cultural                                                                                                                                                       |  |  |  |
| Do you find it difficult to understand the language spoken by your diabetes team?                                                                              |  |  |  |
| Would you find it helpful if there were translation services available to you?                                                                                 |  |  |  |
| Do you feel your diabetes team understands your culture?                                                                                                       |  |  |  |
| Is there more your diabetes team could do to make you feel more comfortable related to your cultural needs?<br>If yes, what?                                   |  |  |  |
| Support                                                                                                                                                        |  |  |  |
| Do your family and friends support you and your diabetes?<br>If yes, how?                                                                                      |  |  |  |
| Do you find having diabetes just too much to handle?                                                                                                           |  |  |  |
| Would you find it helpful to meet with other people with diabetes for support?                                                                                 |  |  |  |

Questionnaire Administeree: \_\_\_\_\_

Date: \_\_\_\_\_

## SUPPLEMENTARY DATA

### Supplementary Appendix 2A. Psychological/Support Care Path

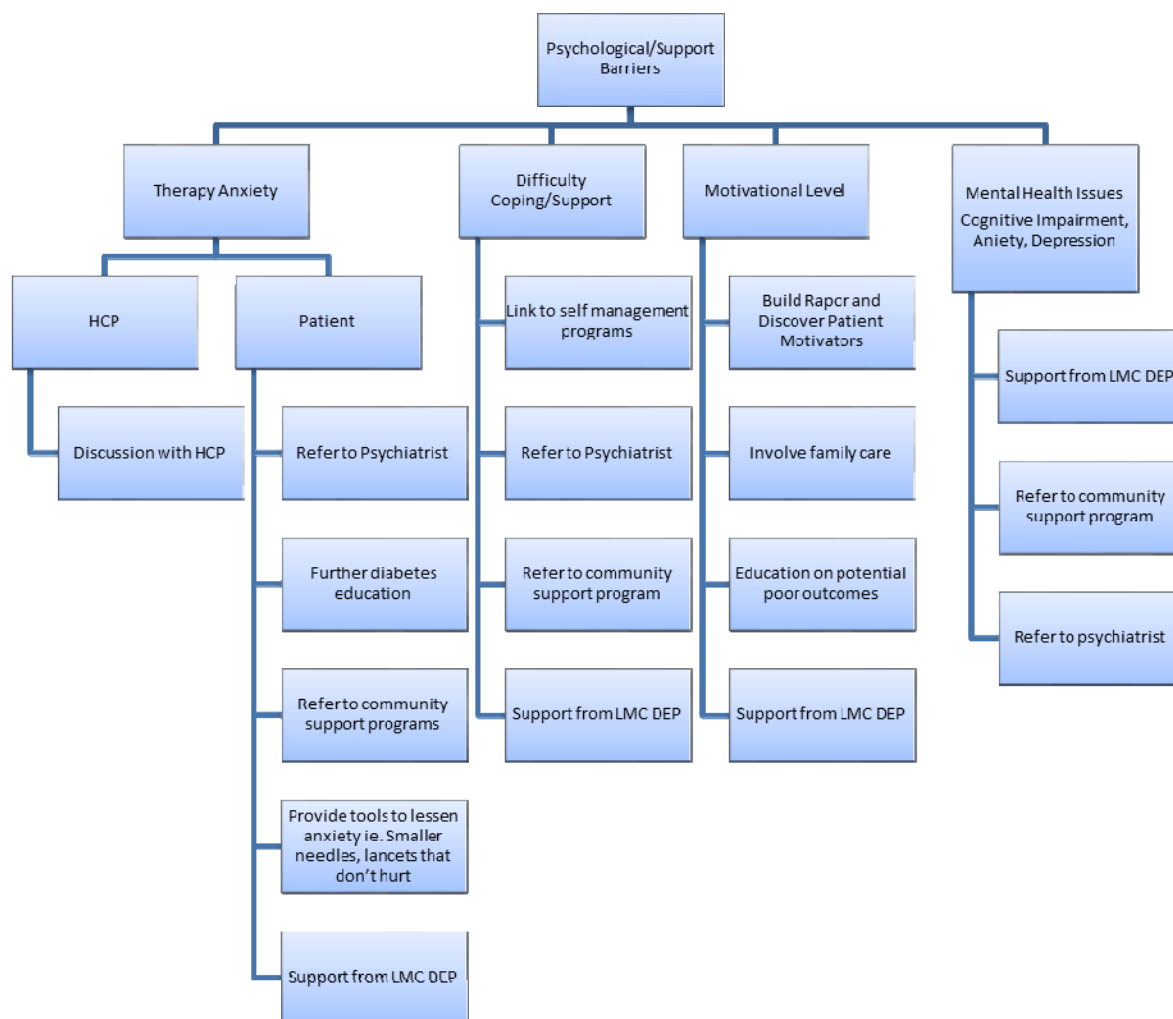

## SUPPLEMENTARY DATA

### Supplementary Appendix 2B. Socioeconomic Care Path

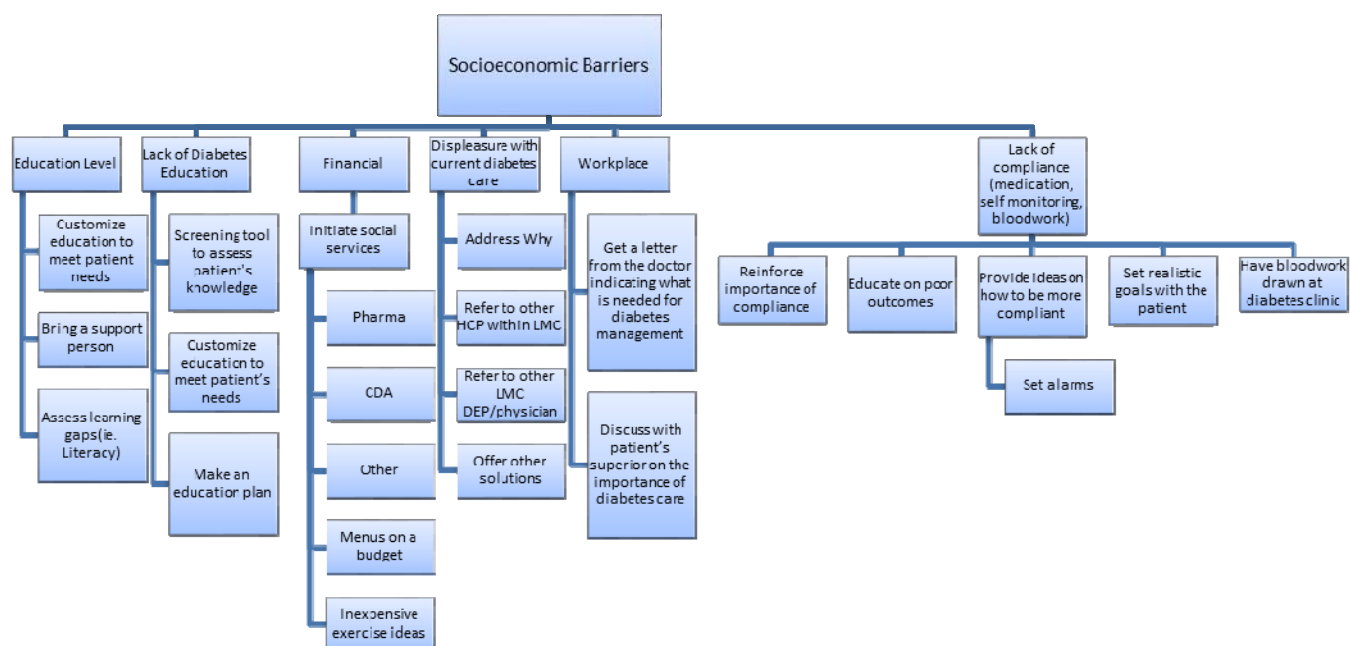

## SUPPLEMENTARY DATA

### Supplementary Appendix 2C. Comorbidity Care Path

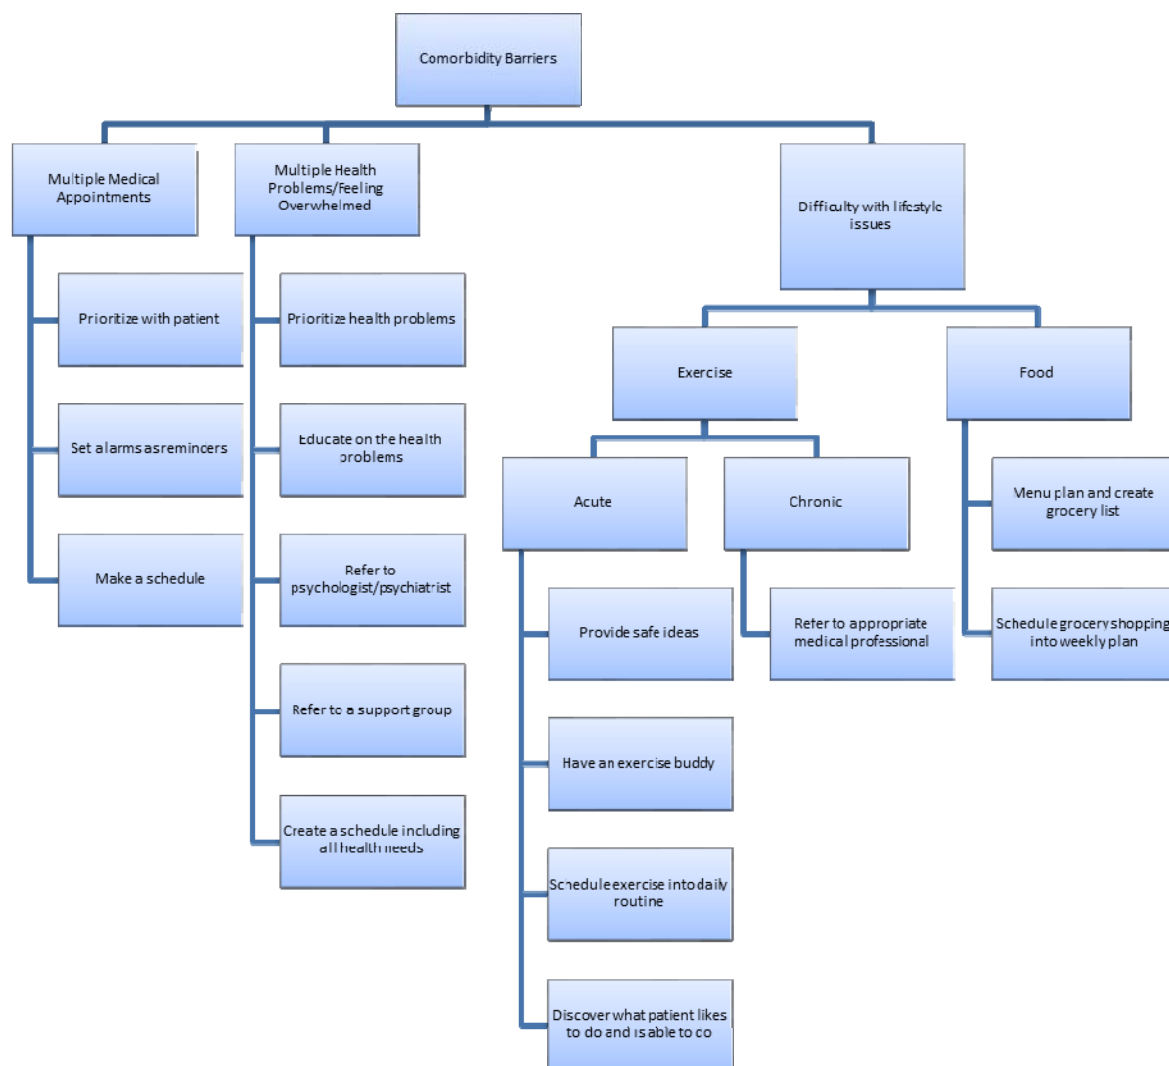

## SUPPLEMENTARY DATA

### Supplementary Appendix 2D. Accessibility Care Path

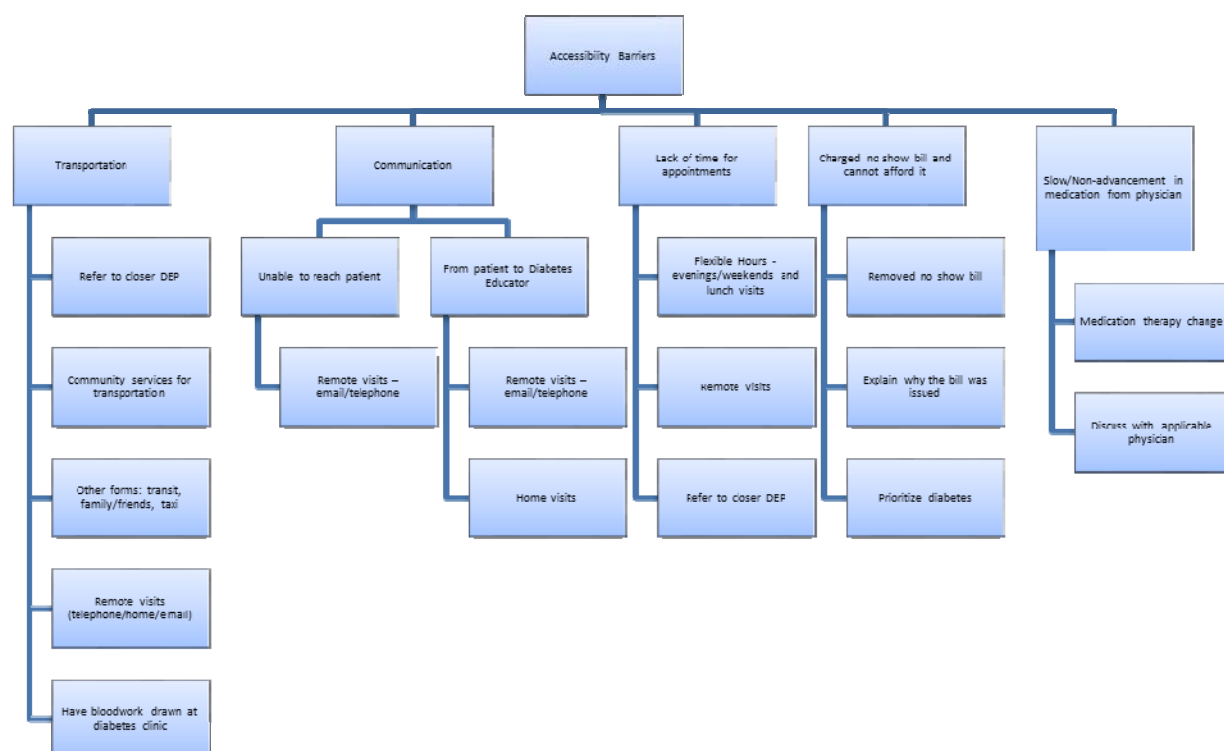

## SUPPLEMENTARY DATA

### Supplementary Appendix 2E. Cultural Barriers Care Path

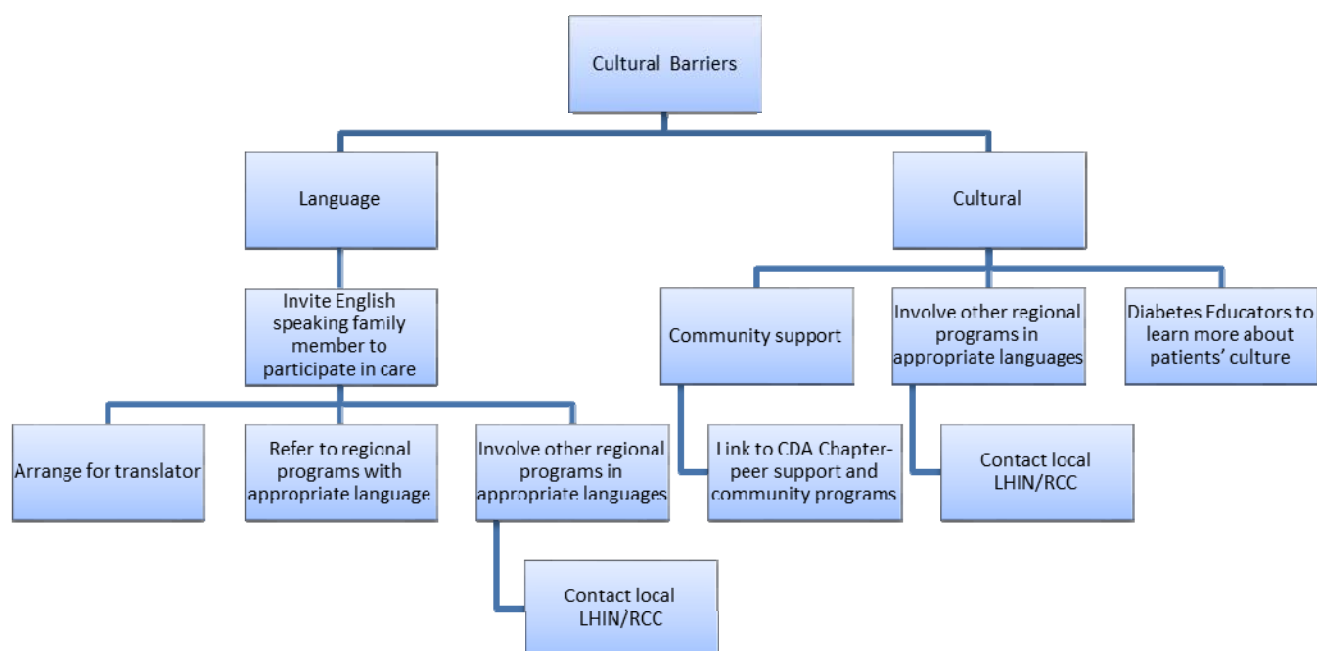

### Supplementary Appendix 3. LMC Patient Registry

All patient medical information recorded within the electronic medical record (EMR) of all LMC-based specialist practices and the Diabetes Education Program

Patients attending LMC clinics are given the option of providing a written informed consent for their EMR data to be used for research purposes.

#### Content

Data is collected by specially trained medical assistants (scribes) and/or pharmacists. All entries are verified/edited by the physician, physician assistant or diabetes educator. Lab data is imported from the provincial laboratory results platform (Ontario Lab Information System).

#### Data includes:

- Demographic information, including ethnicity
- Past medical history
- Past surgical history
- Current history
- Current medication dosages
- Social history including occupation, annual family income, highest personal education level achieved, non-public benefits provider status
- Family history
- Physical examination and vital signs
- All laboratory results
